# Supplementary material for: In situ synthesis of silver supported nanoporous iron oxide microbox hybrids from metal–organic frameworks and their catalytic application in p-nitrophenol reduction
Source: Royal Society of Chemistry journal article supplement (doi:10.1039/c4cp04594g), 2014-12-02
Supplement: c4cp04594g1.pdf [file c4cp04594g1.pdf]

***In Situ* Synthesis of Silver Supported Nanoporous Iron Oxide Microboxes Hybrid from Metal–Organic Frameworks and Their Catalytic Application to *p*-Nitrophenol Reduction**

Zhifeng Jiang, Deli Jiang, A. M. Showkot Hossain, Kun Qian and Jimin Xie\*

School of Chemistry and Chemical Engineering, Jiangsu University, Zhenjiang, 212013, P. R. China

**Author e-mail address:** ntjiangzf@sina.com

**\*Corresponding author:** Jimin Xie

Tel.: +86 11 88791708; fax: +86 11 88791800;

E-mail address: xiejm391@sohu.com

**Supporting Information**

| Catalyst amount                                                    | PNP                            | NaBH <sub>4</sub>             | Rate                                  | Ref. |
|--------------------------------------------------------------------|--------------------------------|-------------------------------|---------------------------------------|------|
| Fe <sub>3</sub> O <sub>4</sub> @SiO <sub>2</sub> -Ag, 1g (0.1 wt%) | 0.12 mM                        | 12 mM                         | 7.67 s <sup>-1</sup> g <sup>-1</sup>  | 1    |
| Ag@halloysite nanotubes, 6*10 <sup>-6</sup> M, 20 mL               | 6*10 <sup>-5</sup> M           | 2.5*10 <sup>-3</sup> M        | 0.087 s <sup>-1</sup> g <sup>-1</sup> | 2    |
| Ag@carbon sphere, 1 mg                                             | 5*10 <sup>-5</sup> M           | 1*10 <sup>-1</sup> M          | 1.69 s <sup>-1</sup> g <sup>-1</sup>  | 3    |
| Ag@hollow poly(N-isopropylacrylamide) sohere, 0.5 g                | 0.32 mg, 50 g H <sub>2</sub> O | 0.27 g, 50 g H <sub>2</sub> O | 0.014 s <sup>-1</sup> g <sup>-1</sup> | 4    |

- (1) Y. Chi, Q. Yuan, Y. Li, J. Tu, L. Zhao, N. Li and X. Li, J. Colloid Interface Sci., 2012, 383, 96-102.
- (2) P. Liu and M. Zhao, Appl. Surf. Sci., 2009, 255, 3989-3993.
- (3) S. Tang, S. Vongehr and X. Meng, J. Phys. Chem. C, 2010, 114, 977-982
- (4) L. Xie, M. Chen and L. Wu, J. Polym. Sci., Part A: Polym. Chem., 2009, 47, 4919-4924.
